# Supplementary material for: Graphite Oxide-TiO2 Nanocomposite Type Photocatalyst for Methanol Photocatalytic Reforming Reaction
Source: Springer Nature journal article supplement (doi:10.1007/s11244-018-0989-z), 2018-05-11
Supplement: MOESM1 [file 15758388]

**SUPPLEMENTARY MATERIAL**

**Graphite oxide-TiO2 nanocomposite type photocatalyst for methanol photocatalytic reforming reaction**

Katalin Majrik2, Árpád Turcsányi1, Zoltán Pászti2, Tamás Szabó1, Attila Domján3, Judith Mihály2, András Tompos2, Imre Dékány1, Emília Tálas2[[1]](#footnote-1)*

*1Department of Physical Chemistry and Materials Science, University of Szeged, H-6720 Szeged, Aradi vértanúk tere 1, Hungary,*

2*Institute of Materials and Environmental Chemistry, Research Centre for Natural Sciences, Hungarian Academy of Sciences, H-1117 Budapest, Magyar tudósok körútja 2, Hungary,*

*3NMR Research Group, Research Centre for Natural Sciences, Hungarian Academy of Sciences, H-1117 Budapest Magyar tudósok körútja 2, Hungary,*

**1S. Experimental**

*1.1S Preparation of reference catalysts*

Pt(NH3)4(NO3)2 (Aldrich) was used as a precursor of supported Pt nanoparticles. AgNO3 was purchased from Molar (Hungary) as analytical grade chemical.

In order to prepare reference Pt/TiO2 catalyst P25 was impregnated by aqueous solution of Pt(NH3)4(NO3)2. The dried sample with 0.5% w Pt load was reduced for 1 hour at 400oC in H2 flow. The Ag/TiO2 reference catalysts were made by mixing the dispersion of TiO2 and aqueous solution of AgNO3. Silver was reduced by adding freshly made sodium borohydride solution (5:1 molar ratio (4x excess) in respect of silver) to the catalyst dispersions. After centrifuging the samples were dried at 50°C then crushed into powder.

*1.2S Sample preparation for model experiments*

In order to simulate the effect of each assumed process which can contribute to the structural changes of the heterocoagulated GO/TiO2 composites under the conditions of the photocatalytic reaction, model samples were prepared by certain treatments of the fresh GO/TiO2 composite. In order to simulate the physical removal of GO sheets from the composites and their rupture, the fresh sample of 2w% GO/TiO2 was stirred for a week at room temperature in the aqueous methanol reaction mixture in dark. This agitated sample was denominated as **A-GO/TiO2** and it was used in the same reaction mixture in which it was prepared. Removal of functional groups and reduction of carbon skeleton can also occur in the methanol solution during the photoinduced reaction. In order to get a model sample representing this process the fresh composite of 2w% GO/TiO2 underwent a hydrothermal treatment at 120°C for 24h in an N2 rinsed autoclave in ethanol/water 1:1 mixture similarly to the procedure used for composite preparation from Hummer’s GO [1]. This hydrothermally treated sample was denominated as **HT-GO/TiO2**. Model sample **AHT-GO/TiO2** was obtained by agitation of HT-GO/TiO2and it also was used in the same reaction mixture in that it was stirred. In order to show the sole effect of UV irradiation during the photoinduced reaction the dry sample of the fresh 2w% GO/TiO2 was exposed to UV irradiation (430 nm) for 2h. The UV irradiated model sample was denominated as **UV-GO/TiO2**.

*1.3S Sample characterization*

Diffuse reflectance UV-visible spectra of the samples were registered using a Jasco V-570 UV-VIS spectrophotometer equipped with a NV-470 type integrating sphere. The data were collected between 800 and 200 nm wavelengths with 100 nm/min speed.

**2S. Results**

*2.1S Characterization of the fresh and recovered photocatalysts*

**Fig. 1S** Diffuse reflectance UV -Vis spectra of the fresh and recovered samples

A: GO/TiO2 composites; B: TiO2;

a: fresh 1w% GO/TiO2; b: fresh 2w% GO/TiO2; c: fresh 10w% GO/TiO2; d: recovered 1w% GO/TiO2; e: recovered 2w% GO/TiO2; f: recovered 10w% GO/TiO2; g: pristine TiO2; h: blank TiO2 fresh; i: recovered TiO2; j: recovered blank TiO2

Fig. 1S shows the diffuse-reflectance UV-Vis spectra of the fresh and recovered photocatalysts. The absorbance of the fresh GO/TiO2 samples was proportional to the carbon content (*cf.* line a, b, c in Fig.1S) as has been described in the literature [2, 3]. The recovered samples showed much higher absorption than the fresh ones, especially in the visible region and these values were also proportional to the initial carbon content of the composites (*cf*. line d, e, f in Fig. 1S). At the same time the color change of pristine TiO2 and blank TiO2 (see Fig. S2B) during the irradiation in methanol solution was negligible. The slight deviation in the absorbance can be explained by the organic deposits picked up from the solution.

*2.2S H2 production over reference catalysts*

Comparing the activity of the reference catalysts which contained metal co-catalyst (Table 1S) outstandingly high H2 evolution rate value was obtained in the presence of Pt as expected. However the hydrogen production of GO/TiO2 (0.50 mmol*h-1gcat-1) exceeded that of Ag/TiO2.

**Table 1S.** Comparison of H2 evolution rate over various P25 TiO2 based photocatalysts

| No | Co-catalyst | Load, w% | H2, mmol*h-1gcat-1) |
| --- | --- | --- | --- |
| 1a | no (pristine) | no | 0.12 |
| 2 | Pt | 0.5 | 9.29 |
| 3 | Ag | 1.0 | 0.30 |
| 4b | Ag | 1.0 | 0.29 |

aaverage of 3 parallel experiments

bparallel preparations

*2.3S Characterization of the samples for model experiments*

**Fig. 2S** Diffuse reflectance UV-Vis spectra of the fresh and recovered samples for model experiments

A: A-GO/TiO2, B: HT-GO/TiO2, C: UV-GO/TiO2 (Abbreviations see in the experimental part). Solid line: fresh composite; dashed line: recovered sample

Regarding the UV-vis spectra of fresh and recovered model catalysts (Figure 2S) the most striking observation was the dark color of the fresh HT-GO/TiO2 which then did not change significantly during the photocatalytic reaction. The other model samples behaved very similarly to the parent 2w% GO/TiO2; strong darkening was observed during the photocatalytic reaction regardless of the degree of development of the H2.

*2.4S Time dependence of H2 production rate*

The time dependence of the hydrogen formation rate of 2% GO/TiO2 (parent composite) and HT-GO/TiO2 (hydrothermal treated composite, see in Chapter *1.2S*) is compared in Figure 3S:. Hydrogen formation rate of these samples after 240 min reaction time is given in Figure 6 of the article.


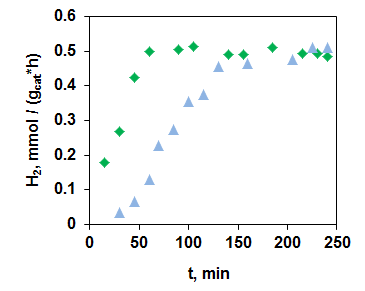


**Figure 3S**. Hydrogen formation rate - reaction time dependencies.

- 2% GO/TiO2 (parent composite)

- HT-GO/TiO2 (hydrothermal treated composite).

In our experiments the H2 formation rate - reaction time dependencies had two main parts, the initial period and a plateau. The plateau was reached earlier in case of HT-GO/TiO2 (hydrothermally pretreated sample) than in case of the parent photocatalyst. In addition the slope is steeper in case of HT-GO/TiO2 than in case of the parent photocatalyst. In our experimental system the plateau of the H2 evolution rate represented a continuous formation of H2 at a constant rate.The gradual increase in the hydrogen production rate during the initial period implied that the methanol solution should have been first saturated by hydrogen and equilibrium for the liquid phase/nitrogen flow should have been reached before the measurement became relevant to real gas evolution. As this process equally occurred for both photocatalysts, the difference in the initial H2 release could have been attributed to another reason: most probably to the transformation of the GO part of the parent photocatalyst *in situ* in the reaction mixture similarly to that had appeared previously under the hydrothermal pretreatment leading to HT-GO/TiO2.

**S References**

1. Zhang Y, Tang ZR, Fu X, Xu YT (2010) TiO2-graphene nanocomposites for gas-phase photocatalytic degradation of volatile aromatic pollutant: is TiO2-graphene truly different from other TiO2-carbon composite materials? ACS Nano 4:7303-7314

Park Y, Kang SH, Choi W (2011) Exfoliated and reorganized graphite oxide on titania nanoparticles as an auxiliary co-catalyst for photocatalytic solar conversion. Phys Chem Chem Phys 13:9425-9431

Zeng P, Zhang Q, Zhang X, Peng T (2012) Graphite oxide-TiO2 nanocomposite and its efficient visible-light driven photocatalytic hydrogen production. J Alloy Compd 516:85-90

1. * Corresponding author, Tel.: +36 1 382 6916, email: [talas.emilia@ttk.mta.hu](mailto:talas.emilia@ttk.mta.hu), address: H-1519 Budapest, P.O.Box 286, Hungary (Emília Tálas) [↑](#footnote-ref-1)
